# Supplementary material for: Comparative Analysis of the Immune Response and the Clinical Allergic Reaction to Papain-like Cysteine Proteases from Fig, Kiwifruit, Papaya, Pineapple and Mites in an Italian Population
Source: MDPI journal article supplement (doi:10.3390/foods12152852), 2023-07-27
Supplement: s1 [file s1]

# Comparative Analysis of the Immune Response and the Clinical Allergic Reaction to Papain-like Cysteine Proteases from Fig, Kiwifruit, Papaya, Pineapple and Mites in an Italian Population

Ivana Giangrieco <sup>1</sup>, Maria Antonietta Ciardiello <sup>1,\*</sup>, Maurizio Tamburrini <sup>1</sup>, Lisa Tuppo <sup>1</sup>, Chiara Rafaiani <sup>2</sup>, Adriano Mari <sup>2,3</sup> and Claudia Alessandri <sup>2,3</sup>

- 1 Institute of Biosciences and BioResources (IBBR), National Research Council of Italy (CNR), 80131 Naples, Italy; ivana.giangrieco@ibbr.cnr.it (I.G.); maurizio.tamburrini@ibbr.cnr.it (M.T.); lisa.tuppo@ibbr.cnr.it (L.T.)
  - 2 Associated Centers for Molecular Allergology (CAAM), 00100 Rome, Italy; pedrigna@gmail.com (C.R.); adriano.mari@caam-allergy.com (A.M.); claudia.alessandri@caam-allergy.com (C.A.)
  - 3 Allergy Data Laboratories (ADL), 04100 Latina, Italy
- \* Correspondence: mariaantoniaetta.ciardiello@ibbr.cnr.it

CLUSTAL O(1.2.4) multiple sequence alignment

|                        |                                                               |     |
|------------------------|---------------------------------------------------------------|-----|
| sp P14518 BROM2_ANACO  | -----                                                         | 0   |
| tr O23799 O23799_ANACO | MAWKVQVVFLLFLFCVMWASPSAASADEPSDPMKRFEWWMVEYGRVYKDNDKMRRFQI    | 60  |
| tr O81084 O81084_ANACO | MAWKVQLVFLFLFLFCVMWASPSAASADEPSDPMKRFEWWMVEYGRVYKDNDKMRRFQI   | 60  |
| tr O23800 O23800_ANACO | MASKVQLVFLFLFLFCVMWASPSAASRDEPSDPMKRFEWMAEYGRVYKDNDKMRRFQI    | 60  |
| tr F1KD58 F1KD58_ANACO | MASKVQLVFLFLFLFCVMWASPSAASRDEPSDPMKRFEWMAEYGRVYKDNDKMRRFQI    | 60  |
| tr Q7DNA3 Q7DNA3_ANACO | -----MAEYGRVYKDNDKMRRFQI                                      | 20  |
| tr O24641 O24641_ANACO | MASKVQLVFLFLFLFCVMWASPSAASRDEPSDPMKRFEWMAEYGRVYKDNDKMRRFQI    | 60  |
| sp O23791 BROM1_ANACO  | MASKVQLVFLFLFLFCAMWASPSAASRDEPNPMMKRFEWMAEYGRVYKDDDEKMRRFQI   | 60  |
| tr O23801 O23801_ANACO | -----EPNDPMMKRFEWMAEYGRVYKDNDKMRRFQI                          | 33  |
| tr F8UN02 F8UN02_ANACO | MASKVQLVFLFLFLFCVMWASPSAASRDEPSDPMKRFEWMAEYGRVYKDNDKMRRFQI    | 60  |
| tr L7UXZ2 L7UXZ2_ANACO | -----                                                         | 0   |
| sp P80884 ANAN_ANACO   | MTSKVQLVFLFLFLFCVMWASPSAASCDPEPSDPMKQFEWMAEYGRVYKDNDKMLRFQI   | 60  |
| tr S5VRY7 S5VRY7_ANACO | MASKVQLVFLFLFLFCVMWASPSAASRDEPSDPMKRFEWMAEYGRVYKDNDKMRRFQI    | 60  |
| tr O81085 O81085_ANACO | MASKVQLVFLFLFLFCVMWASPSAASRDEPSDPMKRFEWMAEYGRVYKDNDKMRRFQI    | 60  |
|                        |                                                               |     |
| sp P14518 BROM2_ANACO  | -----                                                         | 0   |
| tr O23799 O23799_ANACO | FKNNVNHIEFTNSRNENSYTLGINQFTDMTNNEFVAQYTGGISRPLNIEEPVVSFDDVD   | 120 |
| tr O81084 O81084_ANACO | FKNNVNHIEFTNSRNKDSYTLGINQFTDMTNNEFVAQYTGGISRPLNIEEPVVSFDDVD   | 120 |
| tr O23800 O23800_ANACO | FKNNVNHIEFTFNNRNGNSYTLGINKFTDMTNNEFVQYTG-VSLPLNFKREPVSFDDVN   | 119 |
| tr F1KD58 F1KD58_ANACO | FKNNVNHIEFTFNNRNGNSYTLGINKFTDMTNNEFVAQYTGGISRPLNIEKEPVVSFDDVN | 120 |
| tr Q7DNA3 Q7DNA3_ANACO | FKNNVNHIEFTFNNRNGNSYTLGINKFTDMTNNEFVAQYTGGISRPLNIEKEPVVSFDDVN | 80  |
| tr O24641 O24641_ANACO | FKNNVNHIEFTFNNRNGNSYTLGINKFTDMTNNEFVAQYTGGISRPLNIEKEPVVSFDDVN | 120 |
| sp O23791 BROM1_ANACO  | FKNNVKHIEFTNSRNENSYTLGINQFTDMTKSEFVAQYTG-VSLPLNIEEPVVSFDDVN   | 119 |
| tr O23801 O23801_ANACO | FKNNVKHIEFTNSRNNGNSYTLGINQFTDMTKSEFVAQYTG-VSLPLNIEEPVVSFDDVN  | 92  |

|                                                        |                                                               |     |
|--------------------------------------------------------|---------------------------------------------------------------|-----|
| tr F8UN02 F8UN02_ANACO                                 | FKNNVNHIEFTFNHNGNSYTLGINQFTDMTKSEFVAQYTGGISRPLNIEREPPVVSFDDVN | 120 |
| tr L7UXZ2 L7UXZ2_ANACO                                 | -----PVVSFDDVN                                                | 9   |
| sp P80884 ANAN_ANACO                                   | FKNNVNHIEFTFNHNGNSYTLGINQFTDMTNEFVAQYTG-LSLPLNIKREPVSFDDVD    | 119 |
| tr S5VRY7 S5VRY7_ANACO                                 | FKNNVNHIEFTFNHNGNSYTLGINQFTDMTNEFVAQYTG-VSLPLNIEREPPVVSFDDVD  | 119 |
| tr O81085 O81085_ANACO                                 | FKNNVNHIEFTFNHNGNSYTLGINQFTDMTNEFVAQYTG-VSLPLNIEREPPVVSFDDVD  | 119 |
|                                                        |                                                               |     |
| sp P14518 BROM2_ANACO                                  | --AVPQSIDWRDYGAVTSVKQNPCGACWAFAAIATVESIYKIKKGILEPLSEQQVLDC    | 58  |
| tr O23799 O23799_ANACO                                 | ISAVPQSIDWRDYGAVTSVKQNPCGACWAFAAIATVESIYKIKKGILEPLSEQQVLDC    | 180 |
| tr O81084 O81084_ANACO                                 | ISAVPQSIDWRDYGAVTSVKQNPCGACWAFAAIATVESIYKIKKGILEPLSEQQVLDC    | 180 |
| tr O23800 O23800_ANACO                                 | ISAVGQSIDWRDYGAVTEVKDQNPCGSCWAFSAIATVEGIYKIVTGYLVSLSEQEVLDC   | 179 |
| tr F1KD58 F1KD58_ANACO                                 | ISAVGQSIDWRDYGAVTEVKDQNPCGSCWAFSAIATVEGIYKIVTGYLVSLSEQEVLDC   | 180 |
| tr Q7DNA3 Q7DNA3_ANACO                                 | ISAVGQSIDWRDYGAVTEVKDQNPCGSCWAFSAIATVEGIYKIVTGYLVSLSEQEVLDC   | 140 |
| tr O24641 O24641_ANACO                                 | ISAVGQSIDWRDYGAVTEVKDQNPCGSCWAFSAIATVEGIYKIVTGYLVSLSEQEVLDC   | 180 |
| sp O23791 BROM1_ANACO                                  | ISAVPQSIDWRDYGAVNEVKQNPCGSCWAFSAIATVEGIYKIKTGYLVSLSEQEVLDC    | 179 |
| tr O23801 O23801_ANACO                                 | ISAVPQSIDWRDYGAVNEVKQNPCGSCWAFSAIATVEGIYKIKTGYLVSLSEQEVLDC    | 152 |
| tr F8UN02 F8UN02_ANACO                                 | ISAVPQSIDWRDYGAVNEVKQNPCGSCWAFSAIATVEGIYKIKTGYLVSLSEQEVLDC    | 180 |
| tr L7UXZ2 L7UXZ2_ANACO                                 | ISAVPQSIDWRDYGAVNEVKQNPCGSCWAFSAIATVEGIYKIKTGYLVSLSEQEVLDC    | 69  |
| sp P80884 ANAN_ANACO                                   | ISSVPQSIDWRDSGAVTSVKNQGRCGSCWAFASIAATVESIYKIKRGNLVSLSSEQQVLDC | 179 |
| tr S5VRY7 S5VRY7_ANACO                                 | ISAVPQSIDWRNCGAVTSVKQNPCGSCWAFAAIATVESIYKIKRGYLVSLSEQQVLDC    | 179 |
| tr O81085 O81085_ANACO                                 | ISAVPQSIDWRNYGAVTSVKNHIPCSCWAFAAIATVESIYKIKRGYLVSLSEQQVLDC    | 179 |
| : * *****: ***.***: : **:*:*:*****.**** * * ****:***** |                                                               |     |
|                                                        |                                                               |     |
| sp P14518 BROM2_ANACO                                  | KGYGCKGGWEFRAFEFIISNKGVASGAIYPYKAAK--GTCKTDGVPNSAYITGYARVPRN  | 116 |
| tr O23799 O23799_ANACO                                 | KGYGCKGGWEFRAFEFIISNKGVASGAIYPYKAAK--GTCKTNGVPNSAYITGYARVPRN  | 238 |
| tr O81084 O81084_ANACO                                 | KGYGCKGGWEFRAFEFIISNKGVASVAIYPYKAAK--GTCKTNGVPNSAYITGYARVPRN  | 238 |
| tr O23800 O23800_ANACO                                 | VSNGCDGGFVDNAYDFIISNNGVASEADYPYQAYE--GDCTANSWPNSAYITGYSYVRSN  | 237 |
| tr F1KD58 F1KD58_ANACO                                 | VSNGCDGGFVDNAYDFIISNNGVASEADYPYQAYQ--GDCAANSWPNSAYITGYSYVRSN  | 238 |
| tr Q7DNA3 Q7DNA3_ANACO                                 | VSNGCDGGFVDNAYDFIISNNGVASEADYPYQAYQ--GDCAANSWPNSAYITGYSYVRSN  | 198 |
| tr O24641 O24641_ANACO                                 | VSNGCDGGFVDNAYDFIISNNGVASEADYPYQAYQ--GDCAANSWPNSAYITGYSYVRSN  | 238 |
| sp O23791 BROM1_ANACO                                  | VSYGCKGGWVNKAYDFIISNNGVTTEENYPYLAYQ--GTCNANSFPNSAYITGYSYVRRN  | 237 |
| tr O23801 O23801_ANACO                                 | VSYGCKGGWVNKAYDFIISNNGVTTEENYPYQAYQ--GTCNANSFPNSAYITGYSYVRRN  | 210 |
| tr F8UN02 F8UN02_ANACO                                 | VSYGCKGGWVNKAYDFIISNNGVTTEENYPYQAYQ--GTCNANSFPNSAYITGYSYVRRN  | 238 |
| tr L7UXZ2 L7UXZ2_ANACO                                 | VSYGCKGGWVNKAYDFIISNNGVTTEENYPYQAYQ--GTCNANSFPNSAYITGYSYVRRN  | 127 |
| sp P80884 ANAN_ANACO                                   | VSYGCKGGWINKAYSFIISNKGVASAAIYPYKAAK--GTCKTNGVPNSAYITRYTYVQRN  | 237 |
| tr S5VRY7 S5VRY7_ANACO                                 | VSYGCDGGWVNKAYDFIISNKGVASAAIYPYKASQ--GTCRTNGVPNSAYITGYTRVQSN  | 237 |
| tr O81085 O81085_ANACO                                 | VSYGCDGGWVNKAYDFIISNKGVASAAIYPYKASQGGQTCRINGVPNSAYITGYTRVQSN  | 239 |
| . **.*: .*:*****.***: *** * : * * :. ***** *: * *      |                                                               |     |
|                                                        |                                                               |     |
| sp P14518 BROM2_ANACO                                  | NESMMYAVSKQPITVAVDANA-NFQYYKSGVFNGPCGTSLNHAVTAIGYGQDSI-----   | 170 |
| tr O23799 O23799_ANACO                                 | NESMMYAVSKQPITVAVDANA-NFQYYKSGVFNGPCGTSLNHAVTAIGYGQDSNGKKYW   | 297 |

|                                                                            |                                                                             |                   |     |
|----------------------------------------------------------------------------|-----------------------------------------------------------------------------|-------------------|-----|
| tr O81084 O81084_ANACO                                                     | NESMMYAVSKQPITVAVDANA-NSQYYNSGVFNGPCGTSLNH                                  | AVTAIGYGQDSNGKKYW | 297 |
| tr O23800 O23800_ANACO                                                     | DESSMKYAVWNQPIAAAIDASGDNFQYYNGGVFSGPCGTSLNH                                 | AITIIGYGQDSSGTQYW | 297 |
| tr F1KD58 F1KD58_ANACO                                                     | DESSMKYAVWNQPIAAAIDASGDNFQYYNGGVFSGPCGTSLNH                                 | AITIIGYGQD-----   | 291 |
| tr Q7DNA3 Q7DNA3_ANACO                                                     | DESSMKYAVWNQPIAAAIDASGDNFQYYNGGVFSGPCGTSLNH                                 | AITIIGYGQDSSGTQYW | 258 |
| tr O24641 O24641_ANACO                                                     | DESSMKYAVWNQPIAAAIDASGDNFQYYNGGVFSGPCGTSLNH                                 | AITIIGYGQDSSGTQYW | 298 |
| sp O23791 BROM1_ANACO                                                      | DERSMYAVSNQPIAALIDASE-NFQYYNGGVFSGPCGTSLNH                                  | AITIIGYGQDSSGTKYW | 296 |
| tr O23801 O23801_ANACO                                                     | DERSMYAVSNQPIAALIDASE-NFQYYNGGVFSGPCGTSLNH                                  | AITIIGYGQDSSGTKYW | 269 |
| tr F8UN02 F8UN02_ANACO                                                     | DERSMYAVSNQPIAALIDASE-NFQYYNGGVFSGPCGTSLNH                                  | AITIIGYGQDSSGTKYW | 297 |
| tr L7UXZ2 L7UXZ2_ANACO                                                     | DERSMYAVSNQPIAALIDASE-NFQYYNGGVFSGPCGTSLNH                                  | AITIIGYGQDSSGTKYW | 186 |
| sp P80884 ANAN_ANACO                                                       | NERNMMYAVSNQPIAALDASG-NFQHYKRGVFTGPCGTRLNH                                  | AIVIIGYGQDSSGKKFW | 296 |
| tr S5VRY7 S5VRY7_ANACO                                                     | NERSMMYAVSNQPIAASIEASG-DFQHYKRGVFSGPCGTSLNH                                 | AITIIGYGQDSSGKKFW | 296 |
| tr O81085 O81085_ANACO                                                     | NERSMMYAVSNQPIAASIEASG-DFQHYKRGVFSGPCGTSLNH                                 | AITIIGYGQDSSGKKFW | 298 |
| :* . * * * : * * * . : : * . : * : * : * * . * * * * * * * * : . * * * * * |                                                                             |                   |     |
| sp P14518 BROM2_ANACO                                                      | IYPKKWGAKWGEAGYIRMARDVSSSSGICGIAIDPLYPTLEE-----                             |                   | 212 |
| tr O23799 O23799_ANACO                                                     | IVKN <sup>Y</sup> SWGARGWGEAGYIRMARDVSSSSGICGIAIDSLYPTLESANVEAIKMOVSESRSVV  |                   | 356 |
| tr O81084 O81084_ANACO                                                     | IVKN <sup>Y</sup> SWGARGWGEAGYIRMARDVSSSSGICGIAIDSLYPTLESANVEAIKMOVSESRSVV  |                   | 356 |
| tr O23800 O23800_ANACO                                                     | IVKN <sup>Y</sup> SWGSSWGERGYVRMARGVS-SSGLCGIAMDPLYPTLQSGA-----             |                   | 340 |
| tr F1KD58 F1KD58_ANACO                                                     | -----                                                                       |                   | 291 |
| tr Q7DNA3 Q7DNA3_ANACO                                                     | IVKN <sup>Y</sup> SWGSSWGERGYIRMARGVS-SSGLCGIAMDPLYPTLQSGANVAVIKMVSKT----   |                   | 312 |
| tr O24641 O24641_ANACO                                                     | IVKN <sup>Y</sup> SWGSSWGERGYIRMARGVS-SSGLCGIAMDPLYPTLQSGANVAVIKMVSKT----   |                   | 352 |
| sp O23791 BROM1_ANACO                                                      | IVRN <sup>Y</sup> SWGSSWGEAGGYVRMARGVSSSSGVCGIAMAPLFPTLQSGANAEVIKMOVSET---- |                   | 351 |
| tr O23801 O23801_ANACO                                                     | IVRN <sup>Y</sup> SWGSSWGEAGGYVRMARGVSSSSGACGIAMSPLFPTLQSGANVEVIKMOVSET---- |                   | 324 |
| tr F8UN02 F8UN02_ANACO                                                     | IVRN <sup>Y</sup> SWGSSWGEAGGYVRMARGVSSSSGACGIAMSPLFPTLQSGANVEVIKMOVSET---- |                   | 352 |
| tr L7UXZ2 L7UXZ2_ANACO                                                     | IVGN <sup>Y</sup> SWGSSWGEAGGYVRMARGVSSSSGACGIAMSPLFPTLQSGANVEVIKMOVSET---- |                   | 241 |
| sp P80884 ANAN_ANACO                                                       | IVRN <sup>Y</sup> SWGAGWGEAGGYIRLARDVSSSFGLCGIAMDPLYPTLQSGPSVEVI-----       |                   | 345 |
| tr S5VRY7 S5VRY7_ANACO                                                     | IVRN <sup>Y</sup> SWGASWGERGYIRMARDVSSSSGLCGIAIRPLYPTLQSGANVEVIKMOVSESQSSV  |                   | 355 |
| tr O81085 O81085_ANACO                                                     | IVRN <sup>Y</sup> SWGASWGERGYIRMARDVSSSSGLCGIAIRPLYPTLQSGANVEVIKMOVSESRSVV  |                   | 357 |

**Figure S1.** Multiple sequence alignment of the 14 sequences reported in the Allergome database as Ana c 2. The sequences used for this alignment are those provided by UniProt, which include the signal and propeptide regions. The sequence regions removed in the mature proteins are highlighted with a grey background. A glycosylation site (N-X-S) is observed in the first three aligned sequences and it is highlighted in dark green. The three residues involved in the catalytic activity have been highlighted in yellow. The asterisks, colons, and dots indicate the identical amino acid residues, conserved substitutions, and semiconserved substitutions, respectively.

**Table S1.** Amino acid sequence identity (%) between different isoforms of Ana c 2. The accession number of each isoform is reported. The identity values were calculated with the Clustal O algorithm on the UniProt website, using the amino acid sequences aligned in Figure S1.

|        | P14518 | O23799 | O81084 | O23800 | F1KD58 | Q7DNA3 | O24641 | O23791 | O23801 | F8UN02 | L7UXZ2 | P80884 | S5VRY7 | O81085 |
|--------|--------|--------|--------|--------|--------|--------|--------|--------|--------|--------|--------|--------|--------|--------|
| P14518 | 100    |        |        |        |        |        |        |        |        |        |        |        |        |        |
| O23799 | 95.75  | 100    |        |        |        |        |        |        |        |        |        |        |        |        |
| O81084 | 94.34  | 98.03  | 100    |        |        |        |        |        |        |        |        |        |        |        |
| O23800 | 68.72  | 76.99  | 77.29  | 100    |        |        |        |        |        |        |        |        |        |        |
| F1KD58 | 69.05  | 78.97  | 79.31  | 97.24  | 100    |        |        |        |        |        |        |        |        |        |
| Q7DNA3 | 69.19  | 76.21  | 76.21  | 97.00  | 100    | 100    |        |        |        |        |        |        |        |        |
| O24641 | 69.19  | 78.06  | 78.35  | 97.35  | 100    | 100    | 100    |        |        |        |        |        |        |        |
| O23791 | 69.81  | 77.49  | 77.49  | 87.02  | 87.20  | 85.48  | 86.57  | 100    |        |        |        |        |        |        |
| O23801 | 70.28  | 77.16  | 77.16  | 87.18  | 87.40  | 86.77  | 87.00  | 97.53  | 100    |        |        |        |        |        |
| F8UN02 | 70.28  | 79.26  | 79.55  | 88.20  | 90.00  | 87.78  | 89.17  | 96.30  | 98.15  | 100    |        |        |        |        |
| L7UXZ2 | 70.28  | 73.44  | 73.44  | 86.90  | 87.15  | 86.67  | 86.67  | 97.51  | 99.59  | 99.59  | 100    |        |        |        |
| P80884 | 75.94  | 81.16  | 80.87  | 76.65  | 79.93  | 77.63  | 79.36  | 79.71  | 79.87  | 81.16  | 76.60  | 100    |        |        |
| S5VRY7 | 76.89  | 83.10  | 82.82  | 84.07  | 84.78  | 82.26  | 84.29  | 84.33  | 84.26  | 85.47  | 81.33  | 88.41  | 100    |        |
| O81085 | 75.94  | 83.66  | 83.38  | 83.78  | 84.43  | 81.94  | 84.00  | 84.33  | 84.26  | 85.47  | 80.50  | 87.83  | 97.46  | 100    |

**Table S2.** Immunological and clinical data of the 133 patients with specific IgE towards the seven papain-like cysteine proteases analyzed in this study. In addition, the Table shows some details of two patients reporting allergy symptoms after exposure to fig, but they were IgE negative to Fic c Ficin. Patients were selected from a random population of 341 individuals reporting allergy symptoms and subjected to IgE detection with the FABER test.

| Patient details |     |       | FABER 244 (FIU)* |            |             |                            |            |            |                           | Allergy reaction |        |        |                  |     |
|-----------------|-----|-------|------------------|------------|-------------|----------------------------|------------|------------|---------------------------|------------------|--------|--------|------------------|-----|
|                 | Sex | Years | Act d<br>1       | Ana c<br>2 | Cari p<br>2 | Cari p<br>Pap <sup>a</sup> | Der p<br>1 | Der f<br>1 | Fic c<br>Fic <sup>b</sup> | Kiwi             | Ananas | Papaya | HDM <sup>c</sup> | Fig |
| 1               | M   | 15.8  | 1.10             | 0.67       | 0           | 0                          | 0          | 0          | 0                         | 0                | 0      | 0      | 0                | 0   |
| 2               | M   | 6.3   | 0.66             | 0.44       | 0           | 0                          | 0          | 0          | 0                         | 0                | 0      | 0      | 0                | 0   |
| 3               | F   | 10.2  | 0.92             | 2.88       | 0           | 0.62                       | 0          | 0          | 0                         | 1                | 0      | 0      | 0                | 0   |
| 4               | F   | 28.7  | 0                | 24.05      | 26.32       | 0                          | 0          | 0          | 0                         | 0                | 0      | 0      | 0                | 0   |
| 5               | M   | 22.2  | 0                | 1.47       | 13.94       | 3.18                       | 0          | 0          | 0                         | 0                | 0      | 0      | 0                | 0   |
| 6               | M   | 6.6   | 0                | 0.65       | 0.43        | 19.15                      | 9.64       | 11.13      | 0                         | 0                | 0      | 0      | 0                | 0   |
| 7               | M   | 48.5  | 0                | 5.24       | 2.48        | 0                          | 1.24       | 0          | 0                         | 0                | 0      | 0      | 1                | 0   |
| 8               | M   | 3.6   | 0                | 1.38       | 0.92        | 0                          | 3.21       | 8.50       | 0                         | 0                | 0      | 0      | 1                | 0   |
| 9               | M   | 30.0  | 0                | 0          | 6.25        | 0                          | 0          | 0          | 0                         | 0                | 0      | 0      | 0                | 0   |
| 10              | M   | 49.7  | 0                | 0          | 7.30        | 0                          | 0          | 0          | 0                         | 0                | 0      | 0      | 0                | 0   |
| 11              | M   | 37.8  | 0                | 0          | 0.75        | 0                          | 0          | 0          | 0                         | 0                | 0      | 0      | 0                | 0   |
| 12              | F   | 33.1  | 0                | 0          | 2.24        | 0                          | 0          | 0          | 0                         | 0                | 0      | 0      | 0                | 0   |
| 13              | F   | 37.7  | 0                | 1.20       | 0           | 0                          | 0.72       | 0          | 0                         | 0                | 0      | 0      | 1                | 0   |
| 14              | F   | 55.1  | 0                | 0          | 0           | 3.52                       | 1.54       | 0.91       | 0                         | 0                | 0      | 0      | 1                | 0   |
| 15              | F   | 67.8  | 0                | 0          | 0           | 0.72                       | 0          | 0          | 2.14                      | 0                | 0      | 0      | 0                | 0   |
| 16              | F   | 41.5  | 0                | 1.52       | 0           | 0                          | 0          | 0          | 3.82                      | 0                | 0      | 0      | 0                | 0   |

|    |   |      |   |      |   |   |       |       |       |   |   |   |   |   |
|----|---|------|---|------|---|---|-------|-------|-------|---|---|---|---|---|
| 17 | F | 20.1 | 0 | 4.60 | 0 | 0 | 0     | 0     | 4.84  | 0 | 0 | 0 | 0 | 0 |
| 18 | F | 10.0 | 0 | 0    | 0 | 0 | 0     | 0     | 2.87  | 0 | 0 | 0 | 0 | 0 |
| 19 | F | 52.1 | 0 | 0    | 0 | 0 | 0     | 0     | 4.24  | 0 | 0 | 0 | 0 | 0 |
| 20 | F | 51.6 | 0 | 0    | 0 | 0 | 0     | 0     | 2.29  | 0 | 0 | 0 | 0 | 0 |
| 21 | F | 25.4 | 0 | 0    | 0 | 0 | 0     | 0     | 5.16  | 0 | 0 | 0 | 0 | 0 |
| 22 | F | 34.0 | 0 | 0    | 0 | 0 | 0     | 0     | 4.96  | 0 | 0 | 0 | 0 | 0 |
| 23 | F | 16.7 | 0 | 0    | 0 | 0 | 0     | 0     | 4.03  | 0 | 0 | 0 | 0 | 0 |
| 24 | F | 26.3 | 0 | 0    | 0 | 0 | 0     | 0     | 3.98  | 0 | 0 | 0 | 0 | 0 |
| 25 | F | 18.8 | 0 | 0    | 0 | 0 | 0     | 0     | 2.15  | 0 | 0 | 0 | 0 | 0 |
| 26 | F | 55.8 | 0 | 0    | 0 | 0 | 0     | 0     | 3.04  | 0 | 0 | 0 | 0 | 0 |
| 27 | F | 38.6 | 0 | 0    | 0 | 0 | 0     | 0     | 3.52  | 0 | 0 | 0 | 0 | 0 |
| 28 | F | 34.8 | 0 | 0    | 0 | 0 | 0     | 0     | 2.95  | 0 | 0 | 0 | 0 | 0 |
| 29 | F | 44.7 | 0 | 0    | 0 | 0 | 0     | 0     | 3.01  | 0 | 0 | 0 | 0 | 0 |
| 30 | M | 76.9 | 0 | 0    | 0 | 0 | 0.67  | 0     | 2.34  | 0 | 0 | 0 | 0 | 0 |
| 31 | M | 10.7 | 0 | 0    | 0 | 0 | 17.10 | 14.35 | 3.01  | 0 | 0 | 0 | 1 | 0 |
| 32 | F | 25.9 | 0 | 0    | 0 | 0 | 2.10  | 10.35 | 3.13  | 0 | 0 | 0 | 1 | 0 |
| 33 | M | 12.9 | 0 | 0    | 0 | 0 | 3.46  | 12.23 | 2.84  | 0 | 0 | 0 | 1 | 0 |
| 34 | F | 10.7 | 0 | 0    | 0 | 0 | 37.75 | 67.87 | 3.37  | 0 | 0 | 0 | 1 | 0 |
| 35 | F | 2.1  | 0 | 0    | 0 | 0 | 7.43  | 7.44  | 3.74  | 0 | 0 | 0 | 1 | 0 |
| 36 | F | 30.3 | 0 | 0    | 0 | 0 | 1.69  | 0.91  | 0     | 0 | 0 | 0 | 1 | 0 |
| 37 | M | 30.6 | 0 | 0    | 0 | 0 | 2.32  | 5.87  | 0     | 0 | 0 | 0 | 1 | 0 |
| 38 | M | 24.9 | 0 | 0    | 0 | 0 | 0     | 3.33  | 4.42  | 0 | 0 | 0 | 1 | 0 |
| 39 | M | 38.0 | 0 | 0.91 | 0 | 0 | 0     | 0     | 3.98  | 0 | 0 | 0 | 0 | 0 |
| 40 | F | 36.5 | 0 | 2.43 | 0 | 0 | 0     | 0     | 4.85  | 0 | 0 | 0 | 0 | 0 |
| 41 | M | 45.9 | 0 | 0    | 0 | 0 | 0     | 0     | 25.58 | 0 | 0 | 0 | 0 | 0 |
| 42 | F | 50.1 | 0 | 0    | 0 | 0 | 0     | 0     | 4.13  | 0 | 0 | 0 | 0 | 0 |
| 43 | M | 70.2 | 0 | 0    | 0 | 0 | 0     | 0     | 3.73  | 0 | 0 | 0 | 0 | 0 |
| 44 | M | 59.1 | 0 | 0    | 0 | 0 | 0     | 0     | 3.19  | 0 | 0 | 0 | 0 | 0 |
| 45 | M | 11.3 | 0 | 0    | 0 | 0 | 0     | 0     | 3.60  | 0 | 0 | 0 | 0 | 0 |
| 46 | F | 44.6 | 0 | 0    | 0 | 0 | 3.21  | 0     | 0     | 0 | 0 | 0 | 1 | 0 |
| 47 | F | 53.9 | 0 | 0    | 0 | 0 | 1.69  | 0     | 0     | 0 | 0 | 0 | 1 | 0 |
| 48 | F | 36.5 | 0 | 0    | 0 | 0 | 1.39  | 0     | 0     | 0 | 0 | 0 | 1 | 0 |
| 49 | M | 60.5 | 0 | 0    | 0 | 0 | 0.90  | 0     | 0     | 0 | 0 | 0 | 1 | 0 |
| 50 | M | 9.1  | 0 | 0    | 0 | 0 | 0.94  | 0     | 0     | 0 | 0 | 0 | 1 | 0 |
| 51 | M | 64.5 | 0 | 0    | 0 | 0 | 5.29  | 0     | 0     | 0 | 0 | 0 | 1 | 0 |
| 52 | M | 23.5 | 0 | 0    | 0 | 0 | 2.08  | 2.69  | 0     | 0 | 0 | 0 | 1 | 0 |
| 53 | M | 30.6 | 0 | 0    | 0 | 0 | 2.32  | 5.19  | 0     | 0 | 0 | 0 | 1 | 0 |
| 54 | M | 27.7 | 0 | 0    | 0 | 0 | 3.20  | 19.57 | 0     | 0 | 0 | 0 | 1 | 0 |
| 55 | M | 25.8 | 0 | 0    | 0 | 0 | 5.25  | 5.25  | 0     | 0 | 0 | 0 | 1 | 0 |
| 56 | M | 32.5 | 0 | 0    | 0 | 0 | 1.67  | 1.02  | 0     | 0 | 0 | 0 | 1 | 0 |
| 57 | M | 11.8 | 0 | 0    | 0 | 0 | 1.02  | 1.02  | 0     | 0 | 0 | 0 | 1 | 0 |
| 58 | M | 21.0 | 0 | 0    | 0 | 0 | 1.81  | 1.15  | 0     | 0 | 0 | 0 | 1 | 0 |

|     |   |      |   |      |   |   |       |       |   |   |   |   |   |   |
|-----|---|------|---|------|---|---|-------|-------|---|---|---|---|---|---|
| 59  | M | 10.0 | 0 | 0    | 0 | 0 | 2.18  | 1.86  | 0 | 0 | 0 | 0 | 1 | 0 |
| 60  | M | 20.5 | 0 | 0    | 0 | 0 | 0.91  | 1.18  | 0 | 0 | 0 | 0 | 1 | 0 |
| 61  | M | 25.8 | 0 | 0    | 0 | 0 | 5.25  | 5.25  | 0 | 0 | 0 | 0 | 1 | 0 |
| 62  | M | 10.0 | 0 | 0    | 0 | 0 | 0.62  | 1.55  | 0 | 0 | 0 | 0 | 1 | 0 |
| 63  | M | 12.8 | 0 | 0    | 0 | 0 | 7.58  | 13.65 | 0 | 0 | 0 | 0 | 1 | 0 |
| 64  | M | 15.8 | 0 | 0    | 0 | 0 | 9.02  | 19.70 | 0 | 0 | 0 | 0 | 1 | 0 |
| 65  | M | 30.8 | 0 | 0    | 0 | 0 | 1.80  | 2.25  | 0 | 0 | 0 | 0 | 1 | 0 |
| 66  | M | 3.3  | 0 | 0    | 0 | 0 | 2.33  | 6.53  | 0 | 0 | 0 | 0 | 1 | 0 |
| 67  | M | 45.3 | 0 | 0    | 0 | 0 | 4.95  | 1.32  | 0 | 1 | 0 | 0 | 1 | 0 |
| 68  | F | 13.7 | 0 | 0    | 0 | 0 | 3.01  | 4.04  | 0 | 0 | 0 | 0 | 1 | 0 |
| 69  | F | 11.7 | 0 | 0    | 0 | 0 | 26.08 | 22.70 | 0 | 0 | 0 | 0 | 0 | 0 |
| 70  | F | 43.6 | 0 | 0    | 0 | 0 | 2.35  | 4.38  | 0 | 0 | 0 | 0 | 1 | 0 |
| 71  | F | 15.6 | 0 | 0    | 0 | 0 | 4.91  | 9.48  | 0 | 0 | 0 | 0 | 1 | 0 |
| 72  | M | 39.1 | 0 | 3.83 | 0 | 0 | 2.26  | 0.68  | 0 | 0 | 0 | 0 | 1 | 0 |
| 73  | F | 5.2  | 0 | 1.17 | 0 | 0 | 0.71  | 15.82 | 0 | 0 | 0 | 0 | 1 | 0 |
| 74  | F | 15.7 | 0 | 7.62 | 0 | 0 | 0.32  | 0.44  | 0 | 0 | 0 | 0 | 1 | 0 |
| 75  | F | 38.4 | 0 | 2.70 | 0 | 0 | 0.73  | 0.91  | 0 | 0 | 0 | 0 | 1 | 0 |
| 76  | M | 13.5 | 0 | 0.67 | 0 | 0 | 5.81  | 8.21  | 0 | 0 | 0 | 0 | 1 | 0 |
| 77  | M | 29.6 | 0 | 5.32 | 0 | 0 | 0.55  | 1.04  | 0 | 0 | 0 | 0 | 1 | 1 |
| 78  | F | 11.6 | 0 | 0    | 0 | 0 | 4.88  | 7.56  | 0 | 0 | 0 | 0 | 1 | 0 |
| 79  | F | 18.1 | 0 | 0    | 0 | 0 | 1.27  | 0.64  | 0 | 0 | 0 | 0 | 1 | 0 |
| 80  | M | 11.0 | 0 | 0    | 0 | 0 | 0.91  | 1.32  | 0 | 0 | 0 | 0 | 1 | 0 |
| 81  | M | 12.4 | 0 | 0    | 0 | 0 | 0.46  | 0.52  | 0 | 0 | 0 | 0 | 1 | 0 |
| 82  | M | 16.1 | 0 | 0    | 0 | 0 | 2.93  | 2.92  | 0 | 0 | 0 | 0 | 1 | 0 |
| 83  | F | 32.6 | 0 | 0    | 0 | 0 | 1.32  | 3.49  | 0 | 0 | 0 | 0 | 1 | 0 |
| 84  | F | 13.1 | 0 | 0    | 0 | 0 | 0.22  | 0     | 0 | 0 | 0 | 0 | 1 | 0 |
| 85  | F | 39.1 | 0 | 0    | 0 | 0 | 0.57  | 1.97  | 0 | 0 | 0 | 0 | 1 | 0 |
| 86  | F | 39.2 | 0 | 0    | 0 | 0 | 0.20  | 1.05  | 0 | 0 | 0 | 0 | 1 | 0 |
| 87  | F | 47.1 | 0 | 0    | 0 | 0 | 0.91  | 1.17  | 0 | 0 | 0 | 0 | 1 | 0 |
| 88  | F | 14.5 | 0 | 0    | 0 | 0 | 0.55  | 0.98  | 0 | 0 | 0 | 0 | 1 | 0 |
| 89  | F | 45.1 | 0 | 0    | 0 | 0 | 2.48  | 1.16  | 0 | 0 | 0 | 0 | 1 | 0 |
| 90  | F | 48.7 | 0 | 0    | 0 | 0 | 0.49  | 0.55  | 0 | 0 | 0 | 0 | 1 | 0 |
| 91  | F | 33.9 | 0 | 0    | 0 | 0 | 0.91  | 1.21  | 0 | 0 | 0 | 0 | 1 | 0 |
| 92  | F | 34.6 | 0 | 0    | 0 | 0 | 2.64  | 2.55  | 0 | 0 | 0 | 0 | 1 | 0 |
| 93  | F | 8.1  | 0 | 0    | 0 | 0 | 0.72  | 5.39  | 0 | 0 | 0 | 0 | 1 | 0 |
| 94  | F | 16.5 | 0 | 0    | 0 | 0 | 2.05  | 0.57  | 0 | 0 | 0 | 0 | 1 | 0 |
| 95  | F | 47.4 | 0 | 0    | 0 | 0 | 0.65  | 1.84  | 0 | 0 | 0 | 0 | 1 | 0 |
| 96  | F | 9.3  | 0 | 0    | 0 | 0 | 0.70  | 2.01  | 0 | 0 | 0 | 0 | 1 | 0 |
| 97  | F | 36.7 | 0 | 0    | 0 | 0 | 0.37  | 0.48  | 0 | 0 | 0 | 0 | 1 | 0 |
| 98  | F | 45.6 | 0 | 0    | 0 | 0 | 0.46  | 0.60  | 0 | 0 | 0 | 0 | 1 | 0 |
| 99  | F | 20.4 | 0 | 0    | 0 | 0 | 0.46  | 0.37  | 0 | 0 | 0 | 0 | 1 | 0 |
| 100 | F | 42.1 | 0 | 0    | 0 | 0 | 0     | 0.49  | 0 | 0 | 0 | 0 | 1 | 0 |

|     |   |      |   |       |   |   |   |      |   |   |   |   |   |   |
|-----|---|------|---|-------|---|---|---|------|---|---|---|---|---|---|
| 101 | F | 38.0 | 0 | 0     | 0 | 0 | 0 | 1.48 | 0 | 0 | 0 | 0 | 1 | 0 |
| 102 | F | 39.5 | 0 | 0     | 0 | 0 | 0 | 2.25 | 0 | 0 | 0 | 0 | 1 | 0 |
| 103 | F | 51.0 | 0 | 0     | 0 | 0 | 0 | 0.61 | 0 | 0 | 0 | 0 | 1 | 0 |
| 104 | F | 25.5 | 0 | 0     | 0 | 0 | 0 | 0.38 | 0 | 0 | 0 | 0 | 1 | 0 |
| 105 | F | 23.5 | 0 | 0     | 0 | 0 | 0 | 0.82 | 0 | 0 | 0 | 0 | 1 | 0 |
| 106 | F | 74.6 | 0 | 0     | 0 | 0 | 0 | 0.79 | 0 | 0 | 0 | 0 | 1 | 0 |
| 107 | F | 49.6 | 0 | 0     | 0 | 0 | 0 | 0.72 | 0 | 0 | 0 | 0 | 1 | 0 |
| 108 | M | 20.5 | 0 | 0     | 0 | 0 | 0 | 0.48 | 0 | 0 | 0 | 0 | 1 | 0 |
| 109 | M | 12.1 | 0 | 0     | 0 | 0 | 0 | 0.48 | 0 | 0 | 0 | 0 | 1 | 0 |
| 110 | M | 24.2 | 0 | 0     | 0 | 0 | 0 | 0.41 | 0 | 0 | 0 | 0 | 1 | 0 |
| 111 | M | 37.6 | 0 | 0     | 0 | 0 | 0 | 2.04 | 0 | 0 | 0 | 0 | 1 | 0 |
| 112 | M | 70.9 | 0 | 0     | 0 | 0 | 0 | 0.92 | 0 | 0 | 0 | 0 | 1 | 0 |
| 113 | M | 12.6 | 0 | 1.52  | 0 | 0 | 0 | 0.51 | 0 | 0 | 0 | 0 | 1 | 0 |
| 114 | M | 48.0 | 0 | 1.25  | 0 | 0 | 0 | 0.83 | 0 | 0 | 0 | 0 | 1 | 0 |
| 115 | M | 29.5 | 0 | 10.31 | 0 | 0 | 0 | 0    | 0 | 0 | 0 | 0 | 0 | 0 |
| 116 | M | 15.9 | 0 | 9.32  | 0 | 0 | 0 | 0    | 0 | 0 | 0 | 0 | 0 | 0 |
| 117 | M | 25.2 | 0 | 1.06  | 0 | 0 | 0 | 0    | 0 | 0 | 0 | 0 | 0 | 0 |
| 118 | M | 40.2 | 0 | 2.32  | 0 | 0 | 0 | 0    | 0 | 0 | 0 | 0 | 0 | 0 |
| 119 | M | 83.3 | 0 | 45.10 | 0 | 0 | 0 | 0    | 0 | 0 | 0 | 0 | 0 | 0 |
| 120 | M | 22.7 | 0 | 1.07  | 0 | 0 | 0 | 0    | 0 | 0 | 0 | 0 | 0 | 0 |
| 121 | M | 21.6 | 0 | 1.07  | 0 | 0 | 0 | 0    | 0 | 0 | 0 | 0 | 0 | 0 |
| 122 | F | 27.7 | 0 | 4.35  | 0 | 0 | 0 | 0    | 0 | 0 | 0 | 0 | 0 | 0 |
| 123 | F | 35.8 | 0 | 0.66  | 0 | 0 | 0 | 0    | 0 | 0 | 0 | 0 | 0 | 0 |
| 124 | F | 35.0 | 0 | 2.91  | 0 | 0 | 0 | 0    | 0 | 0 | 0 | 0 | 0 | 0 |
| 125 | F | 16.9 | 0 | 0.97  | 0 | 0 | 0 | 0    | 0 | 0 | 0 | 0 | 0 | 0 |
| 126 | F | 52.0 | 0 | 0.79  | 0 | 0 | 0 | 0    | 0 | 0 | 0 | 0 | 0 | 0 |
| 127 | F | 25.0 | 0 | 0.34  | 0 | 0 | 0 | 0    | 0 | 0 | 0 | 0 | 0 | 0 |
| 128 | F | 17.0 | 0 | 30.57 | 0 | 0 | 0 | 0    | 0 | 0 | 0 | 0 | 0 | 0 |
| 129 | F | 26.0 | 0 | 5.08  | 0 | 0 | 0 | 0    | 0 | 0 | 0 | 0 | 0 | 0 |
| 130 | F | 36.5 | 0 | 18.91 | 0 | 0 | 0 | 0    | 0 | 0 | 0 | 0 | 0 | 0 |
| 131 | F | 29.2 | 0 | 0.84  | 0 | 0 | 0 | 0    | 0 | 0 | 0 | 0 | 0 | 0 |
| 132 | M | 24.4 | 0 | 2.19  | 0 | 0 | 0 | 0    | 0 | 0 | 0 | 0 | 0 | 0 |
| 133 | M | 8.1  | 0 | 0.77  | 0 | 0 | 0 | 0    | 0 | 0 | 0 | 0 | 0 | 0 |
| 153 | M | 59.8 | 0 | 0     | 0 | 0 | 0 | 0    | 0 | 0 | 0 | 0 | 0 | 1 |
| 252 | F | 64.9 | 0 | 0     | 0 | 0 | 0 | 0    | 0 | 0 | 0 | 0 | 0 | 1 |

<sup>a</sup> Cari p Papain; <sup>b</sup> Fic c Ficin <sup>c</sup>allergy symptoms towards House Dust Mite (HDM) on the basis of the clinical history. \* FIU, FABER International Units, positive value FIU $\geq$ 0.01.
